# Supplementary material for: Solution viscosity regulates chondrocyte proliferation and phenotype during 3D culture
Source: Royal Society of Chemistry journal article supplement (doi:10.1039/c9tb02204j), 2019-01-01

Figure S1.  $^1\text{H}$  NMR spectra of pristine gelatin and GelMA macromer. The vinyl protons of the methacrylate groups were contributed to peaks at 5.4 ppm and 5.7 ppm. Peak at 2.9 ppm decreased due to reduction of the N-methylene protons in lysine groups after reaction with methacrylic anhydride.

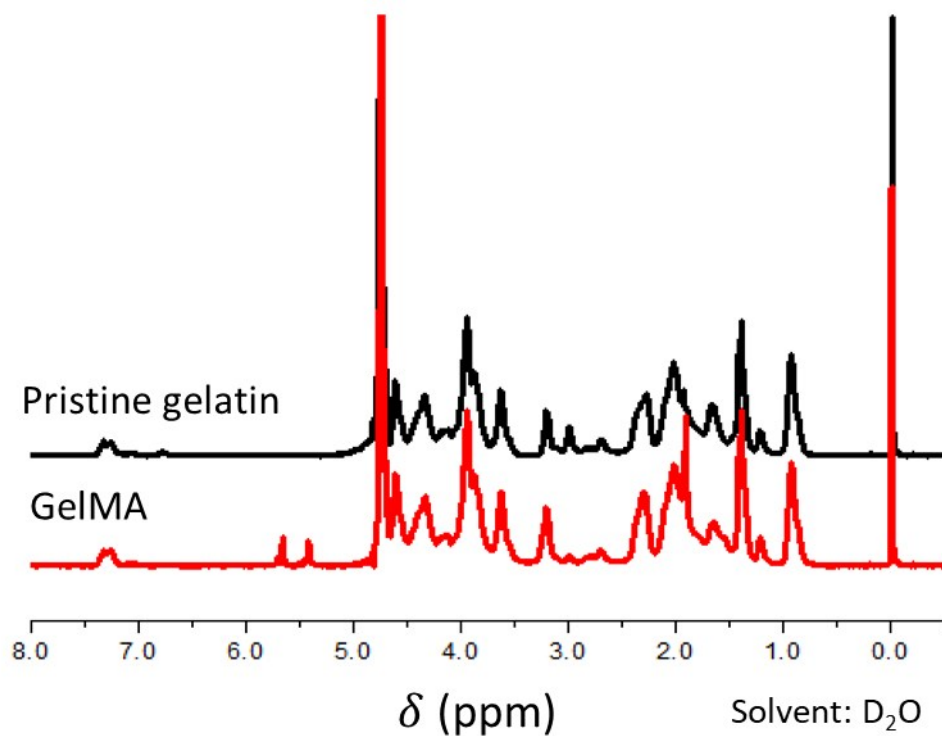

Supplement: c9tb02204j1.pdf [file c9tb02204j1.pdf]
